1 Delay of gratification in non-human animals:

2 A review of inter- and intra-specific variation in performance

3 Irene Susini<sup>1</sup>, Alexandra Safryghin<sup>1</sup>, Friederike Hillemann<sup>2</sup> & Claudia A.F. Wascher<sup>1\*</sup>

4

5 <sup>1</sup>Behavioural Ecology Research Group, School of Life Sciences, Anglia Ruskin University, United  
6 Kingdom

7 <sup>2</sup>Edward Grey Institute of Field Ornithology, Department of Zoology, University of Oxford

8 \*Corresponding author: Claudia A.F. Wascher: School of Life Sciences, Anglia Ruskin University, East

9 Road, Cambridge, CB1 1PT United Kingdom; Phone: +4369912381419; e-mail:

10 [claudia.wascher@gmail.com](mailto:claudia.wascher@gmail.com)

# Abstract

The ability to regulate and withhold an immediate behaviour in pursuit of a more advantageous or valuable, albeit delayed, outcome is generally termed ‘self-control’ and is regarded an important cognitive ability enabling adaptive decision-making in both social and asocial contexts. Abilities to cope with a delay in gratification have been investigated in a range of species using a variety of experimental paradigms. The present study attempts a first systematic analysis of available experimental data from non-human animals, to evaluate the effects of experimental design and taxonomic group on performance in delay of gratification tasks. Data were sourced from 52 separate studies and a comprehensive overview of available literature on delay of gratification in non-human animals is presented, identifying a significant lack of socio-ecological diversity across investigated taxa. Both mean percentage of successful waiting trials and maximum endured delay were found to be significantly affected by experimental design, and both measures of waiting performance were independent of taxonomic order. An analysis of data from 25 studies, for which additional individual-level waiting performances were available, identified substantial intra-specific variation in performance. Overall, cross-species comparisons of delay of gratification abilities are hindered by a lack of consistency in experimental designs, and inferences about evolutionary origins of such capacities are unsuitable at present due to the low number of species tested across different orders. Future research on a larger pool of taxa belonging to separate taxonomic groups is encouraged. Research on social and ecological factors causing intra-specific, individual variation in performance should also be considered.

**Key words:** delay of gratification, self-control, delay maintenance, delay choice, non-human animals

## Introduction

Animals, including humans, are frequently faced with decisions that affect what options or rewards become available in the future ('intertemporal choice') [1]. In cooperative interactions, individuals often invest time and energy despite an immediate benefit not being derived from reciprocation. In a foraging context, individuals may refrain from eating fruits upon first encounter in order to have riper fruits available in the future [2]. In competitive contexts, if aggression is to be avoided, subordinate individuals must often wait in order to obtain access to resources monopolised by higher-ranking conspecifics [3]. Intertemporal choices are also applicable to mate choice scenarios, wherein a female must decide whether to mate with the immediately available partner or whether to wait for a higher-quality mate [4,5]. Waiting, however, bears risks, as resources might become depleted or an individual may not survive long enough for the reward to be harvested [6,7]. The rate of temporal discounting is predicted by several theoretical models. Among these, exponential discounting maintains that a delayed reward is discounted at a constant rate, while hyperbolic discounting predicts the discounting rate to decrease over time [8].

The ability to withhold or delay an immediate behaviour in pursuit of a more advantageous or valuable, albeit delayed, outcome is generally subsumed under the term 'self-control'. Self-control is one of the most challenging forms of behavioural inhibition, and enables adaptive decision-making in both social and asocial contexts [9]. Levels of self-control are assumed to vary between individuals and to be linked to traits regulating motivational and control processes [10]. In humans, high levels of self-control have been shown to be correlated with healthy dietary habits and financial wellbeing [11]. Moreover, high childhood self-control has been suggested to predict positive outcomes later in life, *e.g.* in the context of social and academic competence [12],

resilience [13], mental health [14], and physical health, financial wealth, and criminal activity [15]. A recent replication of the famous marshmallow test, however, challenged the direct link between delay of gratification performance as a child and achievements later in life. While an association was found between the two components, effects were sensitive to the inclusion of control variables describing family and parental-educational and economic background [16]; but see [17].

Since the second half of the 20<sup>th</sup> century, self-control has attracted considerable scientific interest from an array of disciplines, ranging from human economics [18], psychology [19], pharmacology [20], and neuroscience [10], to animal cognition and behavioural ecology [21,22]. Measures of self-control for non-human animals are often interpreted in a comparative context, *i.e.* some species are considered more or less able than others to delay gratification, *e.g.* [22]. Self-control is thought to find its origins in sociality, and cognitive prerequisites of self-control are believed to have evolved together with cooperative social interactions [23]. Alternatively, it is argued that future planning in a foraging context and food-storing behaviour may have led to the evolution of improved abilities to delay immediate gratification, *e.g.* [24,25].

In non-human animals, the ability to delay gratification is typically assessed using established experimental paradigms, *e.g.* accumulation paradigm, exchange paradigm, hybrid delay, and intertemporal choice task (for an overview see [22,26]). Successful experimental trials typically require two components: the selection of a delayed reward over an immediate option, *i.e.* ‘delay choice’, and the ability to sustain the decision even when the alternative, immediate reward is maintained within reach throughout the delay, *i.e.* ‘delay maintenance’ [6]. The ability to delay gratification is successively evaluated most commonly as a measure of maximum endured delay, *e.g.* [27–30]. Results from such experimental studies tend to reflect, however, the performance of a

few individuals waiting in a low number of trials, hence representing the behaviour of single subjects rather than populations or species [28,30].

A major concern associated with the comparison of inhibitory control abilities, *e.g.* self-control, among studies or between species is that measures of such abilities are not always consistent across individuals when different experimental paradigms are used [31,32]. A meta-analysis by Duckworth and Kern (2011) on inhibitory control in humans revealed that cognitive inhibition tasks and delay of gratification questionnaires yielded moderately correlated measures of self-control [33]. Potentially similar difficulties associated with the assessment of inhibitory control remain relatively unexplored in the non-human animal literature (but see [34–36]). Further, at present, no formal agreement exists with regard to which measures prove presence of the ability to delay gratification in a given species – *e.g.* does a minimum delay have to be endured, how many individuals need to endure the delay, and in what percentage of trials? It is also unclear whether inter-individual variations in maximum endured delay reflect biologically meaningful differences in non-human animals. Considering the complexity of inhibitory control and its components, and the consequent inconsistencies across tasks, it remains questionable whether any single measure can be regarded as a comprehensive or reliable evaluation of an individual's inhibition capacities [32].

The present paper offers a systematic review of the available literature on experimental studies reporting delay of gratification performances in non-human animals in an attempt to draw conclusions about ecological and social drivers in the evolution of delay of gratification abilities. Waiting performance, *i.e.* mean percentage of successful waiting trials and maximum endured delay, of species from a range of taxonomic groups was compared across different delay of gratification tasks to test the hypothesis that large-brained, social species (Primates, Psittaciformes,

104 and corvids) perform better in delay of gratification tasks compared to species believed to require  
 105 non-elaborate cognitive skills for cooperative social interactions (*e.g.* Columbiformes and  
 106 Galliformes). Individual variation in waiting performances and effects of experimental paradigm  
 107 used are described, and resulting findings discussed with regard to drawing inferences about the  
 108 evolutionary origin of self-control.

## Methods

### Search protocol and criteria for inclusion

Literature searches were performed through the Web of Science research platform on August 22, 2019. An initial search for 'delay of gratification', 'delayed gratification', 'self-control', 'impulse control', 'impulsivity', 'inhibitory control', or 'intertemporal choice' as keywords yielded 35,268 abstracts. A further search in Scopus for the keywords 'delay of gratification', 'delayed gratification', 'self-control', 'impulse control', 'impulsivity', 'inhibitory control', or 'intertemporal choice' in abstract, title, keywords limit to biological sciences yielded a further 1,095 abstracts. In addition to the 36,363 records found through database searching, 20 studies were identified through alternative sources, such as a recent review by Miller et al. (2019). Abstracts were screened for inclusion and more than 99 % of studies were discarded due to the inclusion of humans as study subjects (36,298 studies). A further 33 studies were excluded from analysis owing to the relevant data being unavailable; only studies that presented mean percentage of successful trials, *i.e.* number of trials in which the focal individual waited out of the total number of trials, and which specified duration of the delay were selected. A total of 52 studies were included in the present systematic review. See Figure 1 for a diagram of the search results and study selection process.

From each included study, mean percentage of successful trials of all tested individuals in a given delay condition was recorded. In the instance of focus animals being tested under multiple delay conditions, performances in each condition were recorded, resulting in multiple data entries per study. Experimental paradigm used (exchange, accumulation, go/no-go, intertemporal choice, rotating tray task) and reward type (qualitative, *i.e.* gain of a more preferred reward after a given delay; or quantitative, *i.e.* gain of more of the same rewards after a given delay) were also recorded. Additionally, data on individual performance of focal individuals was available for 25

studies on 14 species. Mean percentage of successful trials was recorded for each focal individual in a given delay condition.

### Statistical Analyses

To analyse the effect of a small number of target factors (*e.g.* experimental paradigm) on species' performance in self-control tasks, while accounting for repeated measures of species, generalised linear mixed models (GLMM) were generated. Model GLMM1 included mean percentage of successful waiting trials as response variable, with the following factors as fixed effects: biological order, context (qualitative, quantitative), duration of delay (seconds), form of delay test (maintenance, choice), and experimental paradigm (accumulation, exchange, go/no-go, inter temporal choice, rotating tray). Model GLMM2 included maximum endured delay as response variable, while using the same fixed factors as GLMM1: biological order, condition, form of delay test, and experimental paradigm. For each model, species was fitted as a random term. GLMMs were run with Gaussian error distributions, using the 'glmer' function in the 'lme4' R package (version 1.1-19; [37]). *P*-values for fixed factors were obtained from Wald chi-square tests using the Anova function from the 'car' R package. Prior to fitting the regression models, model validity was confirmed through visual inspection of (i) residual distribution, (ii) Q-Q-plots, and (iii) plotting of residuals against fitted values, to test common model assumptions (*e.g.* slopes and intercepts of random effects are normally distributed). Potential multicollinearity between fixed factors was tested for through calculation of variance inflation factors (VIFs) using the 'vif' function in the package 'car' [38]. VIFs were below 2.7 for all fixed factors, suggesting no collinearity [39]. Marginal and conditional  $R^2$  values are provided for model variance description.  $R^2$  values describe the proportion of variance explained by (i) fixed and (ii) fixed and random effects combined,



156    respectively [40]. Marginal and conditional  $R^2$  values were calculated using the 'r.squaredGLMM'  
157    function in 'MuMIn'. All statistical analyses were performed using R version 3.5.3 [41].

# Results

Responses to delay of gratification tasks were analysed for 21 species, spanning across different taxonomic groups and five different experimental paradigms. Data on individual performance were analysed for 14 species. The most studied biological order was primates, with nine species tested, followed by Passeriformes and Rodentia (five species each) and Psittaciformes (three species; Table 1). No species was tested in all five experimental paradigms; on average ( $\pm$  standard deviation, SD), species were tested in  $1.4 (\pm 0.8)$  paradigms. The brown capuchin monkey (*Cebus apella*) represents the most-studied species, being tested in four out of five paradigms. Only three of all tested species (14 %) were tested in both delay maintenance and delay choice tasks, and nine species (43 %) were tested in both quantitative and qualitative contexts.

## GLMM1 – Mean percentage of successive trials

Mean percentage of successful waiting trials was not significantly affected by biological order (Table 2, Figure 2), but whether subjects were tested in a qualitative or quantity context. Individuals waited in a significantly larger proportion of trials in the quantity context, *i.e.* when offered a larger amount of the same food, compared to the quality context, *i.e.* when offered a more preferred type of food reward (estimate  $\pm$  SE =  $-17.918 \pm 4.851$ , t-value =  $-3.754$ ,  $p < 0.001$ ). Mean percentage of successful waiting trials significantly decreased with duration of delay (estimate  $\pm$  SE =  $-0.04 \pm 0.004$ , t-value =  $-8.477$ ,  $p < 0.001$ ; Figure 3), and was significantly higher in delay choice compared to delay maintenance tasks (estimate  $\pm$  SE =  $-41.743 \pm 5.475$ , t-value =  $-7.623$ ,  $p < 0.001$ ). Further, waiting performance was significantly affected by experimental paradigm (Table 2, Figure 4). Overall, 29 % of the variation in mean waiting performance in GLMM1 was explained by all fixed factors together ( $R^2$  marginal), and an additional 23 % of the variation was explained by the random factor (species,  $R^2$  conditional).

## GLMM2 – Maximum endured delay

Individuals reached longer delay durations in delay maintenance compared to delay choice tasks (estimate  $\pm$  SE = 607.06  $\pm$  244.908, t-value = 2.478, p = 0.013). Neither of the investigated factors, *i.e.* biological order, experimental paradigm, and reward type (quality/quantity), exerted a significant effect on maximum endured delay (Table 3). Overall, 25% of variation in maximum endured delay duration in GLMM2 was explained by fixed factors ( $R^2$  marginal), and the random factor ‘species’ explained an additional 31% of variation ( $R^2$  conditional).

## Individual performance

All species showed moderate-to-high intraspecific variation in waiting performance in a range of delay of gratification experiments. Mean percentage of successful trials was compared across all short delay conditions ( $\leq$  15 s) for species for which data on individual waiting performance were available (n=14). Within-species standard deviations were found to be high for all species, indicating individual variation in the ability to cope with delaying a food reward, even for short time periods. Maximum delay endured also showed strong intraspecific variation; while some individuals endured only very short delays (*e.g.* 2 s), other individuals of the same species were willing to wait up to several minutes for a more desired food reward (Table 4).

## Discussion

The present study provides a systematic review of experimental data on delay of gratification abilities across different non-human species, while investigating cross-taxa variability of separate measures of delay of gratification performance (mean percentage of successful trials and maximum endured delay). It had been suggested that species differ in their abilities, or willingness, to wait for a better reward in food-related contexts due to socio-ecological factors; however, our study finds that both proxies of self-control were independent of biological order. Delay of gratification studies typically report data for a small set of individuals, representing a specific taxon (*e.g.*, [27–30,42–47]), which may affect the probability to detect between-species differences. Pronounced intra-specific variation in experimental waiting performance is presented for all species tested, suggesting that factors causing individual variation (*e.g.* body condition or social status) may provide rich opportunities to investigate the evolution of self-control abilities [48].

The biological significance of inter-individual or potential inter-species differences in waiting performance remains, however, unclear. For example, Tonkean macaques, *Macaca tonkeana*, have proved capable of enduring delays of up to 2,560 seconds [44], whilst carrion crows, *Corvus corone*, endured delays of up to 640 seconds [30]. Does this mean that Tonkean macaques are four times better at coping with a delay in gratification compared to carrion crows, or that Tonkean macaques are able to delay future rewards whilst carrion crows are not? Looking at the performance of different groups, Carnivora were the best performing biological Order, followed by Rodentia, Columbiformes, and Primates. On the other hand, Psittaciformes, Galliformes, and Passeriformes (including corvids and starlings) were identified as the worst performing groups. This is surprising as Primates, Psittaciformes, and possibly Passeriformes - which include multiple tested corvid species -

would be expected to represent the best performing groups [49–51]. The present results indicate that any conclusion about the evolution of cognitive skills under certain socio-ecological circumstances must be treated with extreme caution and that more comprehensive and systematic comparative studies are certainly desirable, as current results are drawn from a limited number of studies with a potential bias towards a small number of commonly tested species.

Our systematic review revealed both mean percentage of successful trials and maximum endured delay to be significantly influenced by details of experimental design and whether the design was a delay maintenance or delay choice task. The percentage of successful trials was higher in delay choice than maintenance tasks, indicating that choosing to wait for a better reward seems easier for individuals when is removed after the focal individual has made its choice, compared to actually maintaining the wait while having access to a food item. However, despite being less successful, subjects endured longer delays in the latter paradigm. The characteristics of the experimental design may have yet again shaped such results: while the entire sample is tested in short delay durations, those who fail these first conditions are not tested in longer delay conditions. These paradigms inevitably result in biasing performance in longer delay conditions towards better performing individuals.

A standardisation of experimental paradigms across taxa, however, is challenging, as tasks differ in the degree of training and time required and are thus not universally applicable. This is exemplified, *inter alia*, by exchange paradigms, these being restricted to habituated, trained animals. Researchers have thus been calling for the development of new, automated procedures [22]. A further challenge associated with the implementation of standardised delay of gratification assessments is that artificial experimental designs often present alternative options simultaneously

(e.g. smaller-sooner and larger-later), a setup which does not necessarily reflect food availability in natural foraging contexts and may encourage impulsivity [52][53]. In fact, species which ‘fail’ to cope with delayed gratification under experimental conditions are regularly observed engaging successfully in natural behaviours that require such refraining abilities, including food caching, prey stalking, and long-distance travelling to high-quality food patches [52]. This raises the question of whether existing delay of gratification tasks provide a reliable assessment of an animal’s self-control abilities. It has been suggested that individuals’ performances in standard foraging problems [54,55] may provide a more accurate measure of both human and non-human animals’ time preferences [56].

The present study provides first systematic evidence that currently available data on delay of gratification abilities do not allow for conclusions to be formulated with regard to ecological and social factors driving the evolution of self-control. This is due to a lack of consistency in commonly utilised experimental paradigms. The implementation of experimental designs reflecting species-specific ecology is herein encouraged, in addition to the testing of more species that differ in their socio-ecological characteristics.

## **Acknowledgements**

We are grateful to Corina Logan and Dieter Lukas for manuscript feedback. Many thanks to Valérie Dufour for sharing the raw data of her studies.

## References

1. Stevens JR, Rosati AG, Heilbronner SR, Mühlhoff N. 2011 Waiting for grapes: Expectancy and delayed gratification in bonobos. *Int. J. Comp. Psychol.* **24**, 99–111.
2. Rosati AG. 2017 Foraging cognition: Reviving the ecological intelligence hypothesis. *Trends Cogn. Sci.* **21**, 691–702. (doi:10.1016/j.tics.2017.05.011)
3. Bräuer J, Call J, Tomasello M. 2007 Chimpanzees really know what others can see in a competitive situation. *Anim. Cogn.* **10**, 439–448. (doi:10.1007/s10071-007-0088-1)
4. Sozou PD, Seymour RM. 2003 Augmented discounting: interaction between ageing and time–preference behaviour. *Proc. R. Soc. Lond. B Biol. Sci.* **270**, 1047–1053. (doi:10.1098/rspb.2003.2344)
5. Fawcett TW, McNamara JM, Houston AI. 2012 When is it adaptive to be patient? A general framework for evaluating delayed rewards. *Behav. Processes* **89**, 128–136. (doi:10.1016/j.beproc.2011.08.015)
6. Stevens JR, Stephens DW. 2010 The adaptive nature of impulsivity. In *Impulsivity: The behavioral and neurological science of discounting*. (eds GJ Madden, WK Bickel), pp. 361–387. Washington: American Psychological Association. (doi:10.1037/12069-013)
7. Hayden BY. 2019 Why has evolution not selected for perfect self-control? *Philos. Trans. R. Soc. B Biol. Sci.* **374**, 20180139. (doi:10.1098/rstb.2018.0139)
8. Madden GJ, Bickel WK, Jacobs EA. 1999 Discounting of delayed rewards in opioid-dependent outpatients: Exponential or hyperbolic discounting functions? *Exp. Clin. Psychopharmacol.* **7**, 284–293. (doi:10.1037/1064-1297.7.3.284)
9. Beran MJ. 2015 The comparative science of ‘self-control’: what are we talking about? *Front. Psychol.* (doi:doi: 10.3389/fpsyg.2015.00051)
10. Casey BJ et al. 2011 Behavioral and neural correlates of delay of gratification 40 years later. *Proc. Natl. Acad. Sci.* **108**, 14998–15003. (doi:10.1073/pnas.1108561108)
11. Frederick S, Loewenstein G, O’Donoghue T. 2002 Time discounting and time preference: A critical review. *J. Econ. Lit.* **40**, 351–401.
12. Mischel W, Shoda Y, Rodriguez M. 1989 Delay of gratification in children. *Science* **244**, 933–938. (doi:10.1126/science.2658056)
13. Evenden JL, Ryan CN. 1996 The pharmacology of impulsive behaviour in rats: the effects of drugs on response choice with varying delays of reinforcement. *Psychopharmacology (Berl.)* **128**, 161–170. (doi:10.1007/s002130050121)
14. Kacelnik A, Bateson M. 1997 Risk-sensitivity: crossroads for theories of decision-making. *Trends Cogn. Sci.* **1**, 304–309.
15. Miller R, Boeckle M, Jelbert SA, Frohnwieser A, Wascher CAF, Clayton NS. 2019 Self-control in crows, parrots and nonhuman primates. *Wiley Interdiscip. Rev. Cogn. Sci.* **10**. (doi:10.1002/wcs.1504)
16. Stevens JR, Hauser MD. 2004 Why be nice? Psychological constraints on the evolution of cooperation. *Trends Cogn. Sci.* **8**, 60–65. (doi:10.1016/j.tics.2003.12.003)
17. Raby CR, Alexis DM, Dickinson A, Clayton NS. 2007 Planning for the future by western scrub-jays. *Nature* **445**, 919–921. (doi:10.1038/nature05575)
18. Feeney MC, Roberts WA, Sherry DF. 2011 Black-capped chickadees (*Poecile atricapillus*) anticipate future outcomes of foraging choices. *J. Exp. Psychol. Anim. Behav. Process.* **37**, 30–40. (doi:10.1037/a0019908)
19. Beran MJ. 2018 *Self-control in animals and people*. London: Academic Press.
20. Pelé M, Dufour V, Micheletta J, Thierry B. 2010 Long-tailed macaques display unexpected

314 waiting abilities in exchange tasks. *Anim. Cogn.* **13**, 263–271. (doi:10.1007/s10071-009-0264-6)

315 21. Dufour V, Wascher CAF, Braun A, Miller R, Bugnyar T. 2012 Corvids can decide if a future

316 exchange is worth waiting for. *Biol. Lett.* **8**, 201–204. (doi:10.1098/rsbl.2011.0726)

317 22. Auersperg AMI, Laumer IB, Bugnyar T. 2013 Goffin cockatoos wait for qualitative and

318 quantitative gains but prefer ‘better’ to ‘more’. *Biol. Lett.* **9**, 20121092.

319 (doi:10.1098/rsbl.2012.1092)

320 23. Hillemann F, Bugnyar T, Kotrschal K, Wascher CAF. 2014 Waiting for better, not for more:

321 corvids respond to quality in two delay maintenance tasks. *Anim. Behav.* **90**, 1–10.

322 (doi:10.1016/j.anbehav.2014.01.007)

323 24. Addessi E, Paglieri F, Beran MJ, Evans TA, Macchitella L, De Petrillo F, Focaroli V. 2013 Delay

324 choice versus delay maintenance: Different measures of delayed gratification in capuchin monkeys

325 (*Cebus apella*). *J. Comp. Psychol.* **127**, 392–398. (doi:10.1037/a0031869)

326 25. Brucks D, Marshall-Pescini S, Wallis LJ, Huber L, Range F. 2017 Measures of dogs’ inhibitory

327 control abilities do not correlate across tasks. *Front. Psychol.* **8**, 849.

328 (doi:10.3389/fpsyg.2017.00849)

329 26. Duckworth AL, Kern ML. 2011 A meta-analysis of the convergent validity of self-control

330 measures. *J. Res. Personal.* **45**, 259–268. (doi:10.1016/j.jrp.2011.02.004)

331 27. Bray EE, MacLean EL, Hare BA. 2014 Context specificity of inhibitory control in dogs. *Anim.*

332 *Cogn.* **17**, 15–31. (doi:10.1007/s10071-013-0633-z)

333 28. Marshall-Pescini S, Virányi Z, Range F. 2015 The effect of domestication on inhibitory

334 control: Wolves and dogs compared. *PLOS ONE* **10**, e0118469. (doi:10.1371/journal.pone.0118469)

335 29. Müller CA, Riemer S, Virányi Z, Huber L, Range F. 2016 Inhibitory control, but not prolonged

336 object-related experience appears to affect physical problem-solving performance of pet dogs.

337 *PLOS ONE* **11**, e0147753. (doi:10.1371/journal.pone.0147753)

338 30. Brucks D, Soliani M, Range F, Marshall-Pescini S. 2017 Reward type and behavioural patterns

339 predict dogs’ success in a delay of gratification paradigm. *Sci. Rep.* **7**, 42459.

340 (doi:10.1038/srep42459)

341 31. Bates D, Mächler M, Bolker B, Walker S. 2015 Fitting linear mixed-effects models using lme4.

342 *J. Stat. Softw.* **67**, 1–48.

343 32. Fox J, Weisberg S. 2011 *An {R} Companion to Applied Regression*. second. California: Sage

344 Publications.

345 33. Zuur AF, Ieno EN, Walker NJ, Saveliev AA, Smith GM. 2009 *Mixed Effects Models and*

346 *Extension in Ecology With R*. New York: Springer.

347 34. Nakagawa S, Schielzeth H. 2013 A general and simple method for obtaining R<sup>2</sup> from

348 generalized linear mixed-effects models. *Methods Ecol. Evol.* **4**, 133–142. (doi:10.1111/j.2041-

349 210x.2012.00261.x)

350 35. Beran MJ, Evans TA. 2006 Maintenance of delay of gratification by four chimpanzees (*Pan*

351 *troglodytes*): The effects of delayed reward visibility, experimenter presence, and extended delay

352 intervals. *Behav. Processes* **73**, 315–324. (doi:10.1016/j.beproc.2006.07.005)

353 36. Dufour V, Pelé M, Sterck EHM, Thierry B. 2007 Chimpanzee (*Pan troglodytes*) anticipation of

354 food return: Coping with waiting time in an exchange task. *J. Comp. Psychol.* **121**, 145–155.

355 (doi:10.1037/0735-7036.121.2.145)

356 37. Pelé M, Micheletta J, Uhlrich P, Thierry B, Dufour V. 2011 Delay maintenance in tonkean

357 macaques (*Macaca tonkeana*) and brown capuchin monkeys (*Cebus apella*). *Int. J. Primatol.* **32**,

358 149–166. (doi:10.1007/s10764-010-9446-y)

359 38. Leonardi RJ, Vick S-J, Dufour V. 2012 Waiting for more: the performance of domestic dogs

360 (*Canis familiaris*) on exchange tasks. *Anim. Cogn.* **15**, 107–120. (doi:10.1007/s10071-011-0437-y)



361 39. Koepke AE, Gray SL, Pepperberg IM. 2015 Delayed gratification: A grey parrot (*Psittacus*  
362 *erithacus*) will wait for a better reward. *J. Comp. Psychol.* **129**, 339–346. (doi:10.1037/a0039553)  
363 40. Schwing R, Weber S, Bugnyar T. 2017 Kea (*Nestor notabilis*) decide early when to wait in  
364 food exchange task. *J. Comp. Psychol.* **131**, 269–276. (doi:10.1037/com0000086)  
365 41. Boogert NJ, Madden JR, Morand-Ferron J, Thornton A. 2018 Measuring and understanding  
366 individual differences in cognition. *Philos. Trans. R. Soc. B Biol. Sci.* **373**, 20170280.  
367 (doi:10.1098/rstb.2017.0280)  
368 42. Kim S, Hwang J, Lee D. 2008 Prefrontal coding of temporally discounted values during  
369 intertemporal choice. *Neuron* **59**, 161–172. (doi:10.1016/j.neuron.2008.05.010)  
370 43. Pearson JM, Hayden BY, Platt ML. 2010 Explicit information reduces discounting behavior in  
371 monkeys. *Front. Psychol.* **1**. (doi:10.3389/fpsyg.2010.00237)  
372 44. Blanchard TC, Pearson JM, Hayden BY. 2013 Postreward delays and systematic biases in  
373 measures of animal temporal discounting. *Proc. Natl. Acad. Sci.* **110**, 15491–15496.  
374 (doi:10.1073/pnas.1310446110)  
375 45. Hayden BY, Pearson JM, Platt ML. 2011 Neuronal basis of sequential foraging decisions in a  
376 patchy environment. *Nat. Neurosci.* **14**, 933–939. (doi:10.1038/nn.2856)  
377 46. Blanchard TC, Hayden BY. 2014 Neurons in dorsal anterior cingulate cortex signal  
378 postdecisional variables in a foraging task. *J. Neurosci.* **34**, 646–655. (doi:10.1523/JNEUROSCI.3151-  
379 13.2014)  
380 47. Carter EC, Pedersen EJ, McCullough ME. 2015 Reassessing intertemporal choice: human  
381 decision-making is more optimal in a foraging task than in a self-control task. *Front. Psychol.* **6**.  
382 (doi:10.3389/fpsyg.2015.00095)  
383 48. Cook PF, Spivak M, Berns G. 2016 Neurobehavioral evidence for individual differences in  
384 canine cognitive control: an awake fMRI study. *Anim. Cogn.* **19**, 867–878. (doi:10.1007/s10071-016-  
385 0983-4)  
386 49. Bunford N, Csibra B, Peták C, Ferdinandy B, Miklósi Á, Gácsi M. 2019 Associations among  
387 behavioral inhibition and owner-rated attention, hyperactivity/impulsivity, and personality in the  
388 domestic dog (*Canis familiaris*). *J. Comp. Psychol.* **133**, 233–243. (doi:10.1037/com0000151)  
389 50. Logue AW, Chavarro A, Rachlin H, Reeder RW. 1988 Impulsiveness in pigeons living in the  
390 experimental chamber. *Anim. Learn. Behav.* **16**, 31–39. (doi:10.3758/BF03209040)  
391 51. Grosch J, Neuringer A. 1981 Self-control in pigeons under the Mischel paradigm. *J. Exp. Anal.*  
392 *Behav.* **35**, 3–21.  
393 52. Abeyesinghe SM, Nicol CJ, Hartnell SJ, Wathes CM. 2005 Can domestic fowl, *Gallus gallus*  
394 *domesticus*, show self-control? *Anim. Behav.* **70**, 1–11. (doi:10.1016/j.anbehav.2004.10.011)  
395 53. Malinen LM. 2016 Motor self-regulation and self-control: a comparison of male and female  
396 impulsivity in *Gallus gallus domesticus*. Linköping University.  
397 54. Stephens DW, McLinn CM, Stevens JR. 2006 Effects of temporal clumping and payoff  
398 accumulation on impulsiveness and cooperation. *Behav. Processes* **71**, 29–40.  
399 (doi:10.1016/j.beproc.2005.09.003)  
400 55. Stevens JR, Kennedy BA, Morales D, Burks M. 2016 The domain specificity of intertemporal  
401 choice in pinyon jays. *Psychon. Bull. Rev.* **23**, 915–921. (doi:10.3758/s13423-015-0973-6)  
402 56. Dunn J, Andrews C, Nettle D, Bateson M. 2019 Developmental history, energetic state and  
403 choice impulsivity in European starlings, *Sturnus vulgaris*. *Anim. Cogn.* **22**, 413–421.  
404 (doi:10.1007/s10071-019-01254-5)  
405 57. Miller R, Frohnwieser A, Schiestl M, McCoy DE, Gray RD, Taylor AH, Clayton NS. 2020  
406 Delayed gratification in New Caledonian crows and young children: influence of reward type and  
407 visibility. *Anim. Cogn.* **23**, 71–85. (doi:10.1007/s10071-019-01317-7)

58. Drapier M, Chauvin C, Dufour V, Uhlrich P, Thierry B. 2005 Food-exchange with humans in brown capuchin monkeys. *Primates* **46**, 241–248. (doi:10.1007/s10329-005-0132-1)
59. Ramseyer A, Pelé M, Dufour V, Chauvin C, Thierry B. 2006 Accepting loss: the temporal limits of reciprocity in brown capuchin monkeys. *Proc. R. Soc. B Biol. Sci.* **273**, 179–184. (doi:10.1098/rspb.2005.3300)
60. Amici F, Aureli F, Call J. 2008 Fission-fusion dynamics, behavioral flexibility, and inhibitory control in primates. *Curr. Biol.* **18**, 1415–1419. (doi:10.1016/j.cub.2008.08.020)
61. Anderson JR, Kuroshima H, Fujita K. 2010 Delay of gratification in capuchin monkeys (*Cebus apella*) and squirrel monkeys (*Saimiri sciureus*). *J. Comp. Psychol.* **124**, 205–210. (doi:10.1037/a0018240)
62. Bramlett JL, Perdue BM, Evans TA, Beran MJ. 2012 Capuchin monkeys (*Cebus apella*) let lesser rewards pass them by to get better rewards. *Anim. Cogn.* **15**, 963–969. (doi:10.1007/s10071-012-0522-x)
63. Evans TA, Beran MJ, Paglieri F, Addessi E. 2012 Delaying gratification for food and tokens in capuchin monkeys (*Cebus apella*) and chimpanzees (*Pan troglodytes*): when quantity is salient, symbolic stimuli do not improve performance. *Anim. Cogn.* **15**, 539–548. (doi:10.1007/s10071-012-0482-1)
64. Paglieri F, Focaroli V, Bramlett J, Tierno V, McIntyre JM, Addessi E, Evans TA, Beran MJ. 2013 The hybrid delay task: Can capuchin monkeys (*Cebus apella*) sustain a delay after an initial choice to do so? *Behav. Processes* **94**, 45–54. (doi:10.1016/j.beproc.2012.12.002)
65. Addessi E *et al.* 2014 Waiting by mistake: Symbolic representation of rewards modulates intertemporal choice in capuchin monkeys, preschool children and adult humans. *Cognition* **130**, 428–441. (doi:10.1016/j.cognition.2013.11.019)
66. De Petrillo F, Gori E, Micucci A, Ponsi G, Paglieri F, Addessi E. 2015 When is it worth waiting for? Food quantity, but not food quality, affects delay tolerance in tufted capuchin monkeys. *Anim. Cogn.* **18**, 1019–1029. (doi:10.1007/s10071-015-0869-x)
67. Beran MJ, Perdue BM, Rossettie MS, James BT, Whitham W, Walker B, Futch SE, Parrish AE. 2016 Self-control assessments of capuchin monkeys with the rotating tray task and the accumulation task. *Behav. Processes* **129**, 68–79. (doi:10.1016/j.beproc.2016.06.007)
68. Parrish A, Emerson I, Rossettie M, Beran M. 2016 Testing the glucose hypothesis among capuchin monkeys: Does glucose boost self-control? *Behav. Sci.* **6**, 16. (doi:10.3390/bs6030016)
69. Beran MJ, Evans TA. 2012 Language-trained chimpanzees (*Pan troglodytes*) delay gratification by choosing token exchange over immediate reward consumption: Tokens and delay of gratification. *Am. J. Primatol.* **74**, 864–870. (doi:10.1002/ajp.22042)
70. Beran MJ, Rossettie MS, Parrish AE. 2016 Trading up: chimpanzees (*Pan troglodytes*) show self-control through their exchange behavior. *Anim. Cogn.* **19**, 109–121. (doi:10.1007/s10071-015-0916-7)
71. Beran MJ, James BT, Whitham W, Parrish AE. 2016 Chimpanzees can point to smaller amounts of food to accumulate larger amounts but they still fail the reverse-reward contingency task. *J. Exp. Psychol. Anim. Learn. Cogn.* **42**, 347–358. (doi:10.1037/xan0000115)
72. Adriani W, Romani C, Manciooco A, Vitale A, Laviola G. 2013 Individual differences in choice (in)flexibility but not impulsivity in the common marmoset: An automated, operant-behavior choice task. *Behav. Brain Res.* **256**, 554–563. (doi:10.1016/j.bbr.2013.09.001)
73. Genty E, Karpel H, Silberberg A. 2012 Time preferences in long-tailed macaques (*Macaca fascicularis*) and humans (*Homo sapiens*). *Anim. Cogn.* **15**, 1161–1172. (doi:10.1007/s10071-012-0540-8)
74. Szalda-Petree AD, Craft BB, Martin LM, Deditius-Island HK. 2004 Self-control in rhesus

455 macaques (*Macaca Mulatta*): Controlling for differential stimulus exposure. *Percept. Mot. Skills* **98**,  
456 141–146. (doi:10.2466/pms.98.1.141-146)

457 75. Evans TA, Beran MJ. 2007 Delay of gratification and delay maintenance by rhesus macaques  
458 (*Macaca Mulatta*). *J. Gen. Psychol.* **134**, 199–216. (doi:10.3200/GENP.134.2.199-216)

459 76. Hwang J. 2009 Temporal discounting and inter-temporal choice in rhesus monkeys. *Front.*  
460 *Behav. Neurosci.* (doi:10.3389/neuro.08.009.2009)

461 77. Vick S-J, Bovet D, Anderson JR. 2010 How do African grey parrots (*Psittacus erithacus*)  
462 perform on a delay of gratification task? *Anim. Cogn.* **13**, 351–358. (doi:10.1007/s10071-009-0284-  
463 2)

464 78. Madden GJ, Smith NG, Brewer AT, Pinkston JW, Johnson PS. 2008 Steady-state assessment  
465 of impulsive choice in lewis and fischer 344 rats: Between-condition delay manipulations. *J. Exp.*  
466 *Anal. Behav.* **90**, 333–344. (doi:10.1901/jeab.2008.90-333)

467 79. Roesch MR, Takahashi Y, Gugsu N, Bissonette GB, Schoenbaum G. 2007 Previous cocaine  
468 exposure makes rats hypersensitive to both delay and reward magnitude. *J. Neurosci.* **27**, 245–250.  
469 (doi:10.1523/JNEUROSCI.4080-06.2007)

470 80. Reynolds B, de Wit H, Richards JB. 2002 Delay of gratification and delay discounting in rats.  
471 *Behav. Processes* **59**, 157–168. (doi:10.1016/S0376-6357(02)00088-8)

472 81. Farrar AM, Kieres AK, Hausknecht KA, de Wit H, Richards JB. 2003 Effects of reinforcer  
473 magnitude on an animal model of impulsive behavior. *Behav. Processes* **64**, 261–271.  
474 (doi:10.1016/S0376-6357(03)00139-6)

475 82. Green L, Estle SJ. 2003 Preference reversals with food and water reinforcers in rats. *J. Exp.*  
476 *Anal. Behav.* **79**, 233–242. (doi:10.1901/jeab.2003.79-233)

477 83. Krebs CA, Reilly WJ, Anderson KG. 2016 Reinforcer magnitude affects delay discounting and  
478 influences effects of d-amphetamine in rats. *Behav. Processes* **130**, 39–45.  
479 (doi:10.1016/j.beproc.2016.07.004)

480 84. Steele CC, Pirkle JRA, Kirkpatrick K. 2017 Diet-induced impulsivity: Effects of a high-fat and a  
481 high-sugar diet on impulsive choice in rats. *PLOS ONE* **12**, e0180510.  
482 (doi:10.1371/journal.pone.0180510)

483 85. Cano AM, Murphy ES, Lupfer G. 2016 Delay discounting predicts binge-eating in Wistar rats.  
484 *Behav. Processes* **132**, 1–4. (doi:10.1016/j.beproc.2016.08.011)

485 86. Aparicio CF, Hennigan PJ, Mulligan LJ, Alonso-Alvarez B. 2019 Spontaneously hypertensive  
486 (SHR) rats choose more impulsively than Wistar-Kyoto (WKY) rats on a delay discounting task.  
487 *Behav. Brain Res.* **364**, 480–493. (doi:10.1016/j.bbr.2017.09.040)

488

## 489    **Tables and Figures**

490    Table 1: Different taxonomic Orders and species tested in different experimental paradigms. X  
 491    indicates a species has been tested in a specific paradigm, when the column is empty, the  
 492    respective species has not been tested. Accumulation, exchange, go-no go and rotating tray tasks  
 493    are delay maintenance tasks, and inter temporal choice tasks are delay choice, except one  
 494    exchange study, which was conducted as delay maintenance and delay choice.

| Order          | Species               | Accumulation | Exchange | Go-No Go | Inter-Temporal Choice | Rotating Tray Task | References    |
|----------------|-----------------------|--------------|----------|----------|-----------------------|--------------------|---------------|
| Carnivora      | Domestic dog          |              | x •      | x        |                       |                    | [45,57,58]    |
| Columbiformes  | White Carneau Pigeon  |              |          |          | x                     |                    | [59]          |
|                | White King pigeon     |              |          | x        |                       |                    | [60]          |
| Galliformes    | ISA Brown layer hen   |              |          |          | x                     |                    | [61]          |
|                | White leghorn chick   |              |          |          | x                     |                    | [62]          |
| Passeriformes  | Blue jay              |              |          |          | x                     |                    | [63,64]       |
|                | Carrion crow          | x •          | x •      |          |                       |                    | [28,30]       |
|                | Common raven          | x •          | x •      |          |                       |                    | [28,30]       |
|                | European starling     |              |          |          | x                     |                    | [65]          |
|                | New Caledonian crow   |              |          |          |                       | x •                | [66]          |
| Primates       | Brown capuchin monkey | x            | x •      |          | x •                   | x •                | [31,44,67–77] |
|                | Chimpanzee            | x            | x •      |          |                       |                    | [42,43,78–80] |
|                | Common marmoset       |              |          |          | x                     |                    | [2,81]        |
|                | Cottontop tamarin     |              |          |          | x                     |                    | [2]           |
|                | Long-tailed macaque   | x            | x        |          | x                     |                    | [27,69,82]    |
|                | Rhesus macaque        | x            |          | x •      | x                     |                    | [83–85]       |
|                | Spider monkey         |              |          |          | x                     |                    | [69]          |
|                | Squirrel monkey       | x            |          |          |                       |                    | [70]          |
|                | Tonkean macaque       |              | x        |          |                       |                    | [44]          |
| Psittaciformes | Grey parrot           | x •          |          |          |                       |                    | [46,86]       |
|                | Goffin cockatoo       |              | x •      |          |                       |                    | [29]          |
|                | Kea                   |              | x •      |          |                       |                    | [47]          |
| Rodentia       | F344 rat              |              |          |          | x                     |                    | [87]          |
|                | Lewis rat             |              |          |          | x                     |                    | [87]          |
|                | Long–evans rats       |              |          |          | x                     |                    | [88]          |
|                | Sprague dawley rats   |              |          |          | x                     |                    | [89–93]       |
|                | Wistar kyoto rats     |              |          |          | x                     |                    | [94,95]       |

495 •qualitative context

496 xquantitative context

**Table 2:** Results of the generalized mixed linear model (GLMM1) investigating factors affecting mean waiting performance, measures as mean percentage of successive trials per species. Significance levels were obtained from Wald chi-square tests, significant factors are highlighted in bold.

| Parameters                                                       | Estimate $\pm$ SE                      | <i>t</i>      | <i>P</i>         |
|------------------------------------------------------------------|----------------------------------------|---------------|------------------|
| <b>Intercept</b>                                                 | <b>116.315 <math>\pm</math> 20.424</b> | <b>5.694</b>  | <b>&lt;0.001</b> |
| Order (Columbiformes relative to Carnivora)                      | -34.685 $\pm$ 27.17                    | -1.276        | 0.159            |
| Order (Galliformes relative to Carnivora)                        | -25.274 $\pm$ 27.727                   | -0.911        |                  |
| Order (Passeriformes relative to Carnivora)                      | -40.418 $\pm$ 20.806                   | -1.942        |                  |
| Order (Primates relative to Carnivora)                           | -11.926 $\pm$ 19.733                   | -0.604        |                  |
| Order (Psittaciformes relative to Carnivora)                     | -20.149 $\pm$ 21.512                   | -0.936        |                  |
| Order (Rodentia relative to Carnivora)                           | -14.876 $\pm$ 21.5                     | -0.691        |                  |
| <b>Context (quantity relative to quality)</b>                    | <b>-17.918 <math>\pm</math> 3.693</b>  | <b>-4.851</b> | <b>&lt;0.001</b> |
| <b>Delay duration</b>                                            | <b>-0.04 <math>\pm</math> 0.004</b>    | <b>-8.477</b> | <b>&lt;0.001</b> |
| <b>Form (delay maintenance relative to delay choice)</b>         | <b>-41.743 <math>\pm</math> 5.475</b>  | <b>-7.623</b> | <b>&lt;0.001</b> |
| <b>Paradigm (exchange relative to accumulation)</b>              | <b>7.5 <math>\pm</math> 4.058</b>      | <b>1.848</b>  | <b>&lt;0.001</b> |
| <b>Paradigm (go/no-go relative to accumulation)</b>              | <b>28.446 <math>\pm</math> 13.385</b>  | <b>2.125</b>  |                  |
| <b>Paradigm (inter temporal choice relative to accumulation)</b> | <b>-29.401 <math>\pm</math> 8.862</b>  | <b>-3.317</b> |                  |
| <b>Paradigm (rotating tray relative to accumulation)</b>         | <b>30.327 <math>\pm</math> 8.379</b>   | <b>3.619</b>  |                  |

501

**Table 3:** Results of the generalized mixed linear model (GLMM2) investigating factors affecting maximum endured delay.

| Parameters                                      | Estimate ± SE           | <i>z</i>     | <i>P</i>     |
|-------------------------------------------------|-------------------------|--------------|--------------|
| Intercept                                       | -458.114 ± 624.466      | -0.733       | 0.463        |
| Order (Columbiformes relative to Carnivora)     | 349.5 ± 657.58          | 0.531        | 0.575        |
| Order (Galliformes relative to Carnivora)       | 503.746 ± 692.532       | 0.727        |              |
| Order (Passeriformes relative to Carnivora)     | 217.093 ± 587.718       | 0.369        |              |
| Order (Primates relative to Carnivora)          | 615.365 ± 551.455       | 1.115        |              |
| Order (Psittaciformes relative to Carnivora)    | -20.882 ± 610.505       | -0.034       |              |
| Order (Rodentia relative to Carnivora)          | 532.976 ± 616.36        | 0.864        |              |
| Context (quantity relative to quality)          | -39.862 ± 191.495       | -0.208       | 0.835        |
| <b>Form (maintenance relative to choice)</b>    | <b>607.06 ± 244.908</b> | <b>2.478</b> | <b>0.013</b> |
| Paradigm (exchange relative to accumulation)    | 130.802 ± 193.112       | 0.677        | 0.314        |
| Paradigm (go/no-go relative to accumulation)    | -328.968 ± 403.839      | -0.814       |              |
| Paradigm (rotating to relative to accumulation) | -470.351 ± 384.966      | -1.221       |              |

Table 4: Variation in individual waiting performance in studies for which data on individual performance was available (14 studies). Percentage of successful trials per delay condition (mean and standard deviation, SD) across all individuals and all trials with short delay conditions (15 seconds and less), minimum to maximum delay condition endured by at least one individual are given for all studies where the maximum delay duration was not fixed, number of individuals succeeding in maximum delay condition and number of individuals tested (NrIndMax), and number of individuals tested (NrInd).

| Species               | Mean Success (% trials, short delays) | SD    | Endured delay (seconds; min - max) | Nr Ind Max | Nr Ind |
|-----------------------|---------------------------------------|-------|------------------------------------|------------|--------|
| Domestic dog          | 70.43                                 | 19.45 | fixed                              | 13         | 42     |
| Carrion crow          | 21.79                                 | 26.65 | 5 - 640                            | 1          | 10     |
| Common raven          | 21.75                                 | 26.15 | 5 - 320                            | 1          | 6      |
| European starling     | 37.18                                 | 17.63 | fixed                              | 29         | 29     |
| New Caledonian crow   | 80.47                                 | 25.71 | fixed                              | 9          | 9      |
| Brown capuchin monkey | 67.4                                  | 33.60 | 2 - 2560                           | 1          | 25     |
| Chimpanzee            | 78.64                                 | 23.19 | 10 - 480                           | 4          | 9      |
| Long-tailed macaque   | 77.59                                 | 27.98 | 80 - 2560                          | 1          | 15     |
| Rhesus macaque        | 31.10                                 | 34.02 | fixed                              | 2          | 14     |
| Squirrel monkey       | 9.75                                  | 16.3  | fixed                              | 4          | 4      |
| Tonkean macaque       | 75.43                                 | 29.21 | 320 - 2560                         | 4          | 10     |
| Goffin cockatoo       | 22.67                                 | 21.71 | 10 - 320                           | 1          | 14     |
| Grey parrot           | 47.1                                  | 28.38 | 2 - 900                            | 1          | 4      |
| Rats                  | 33.69                                 | 32.39 | fixed                              | 24         | 43     |



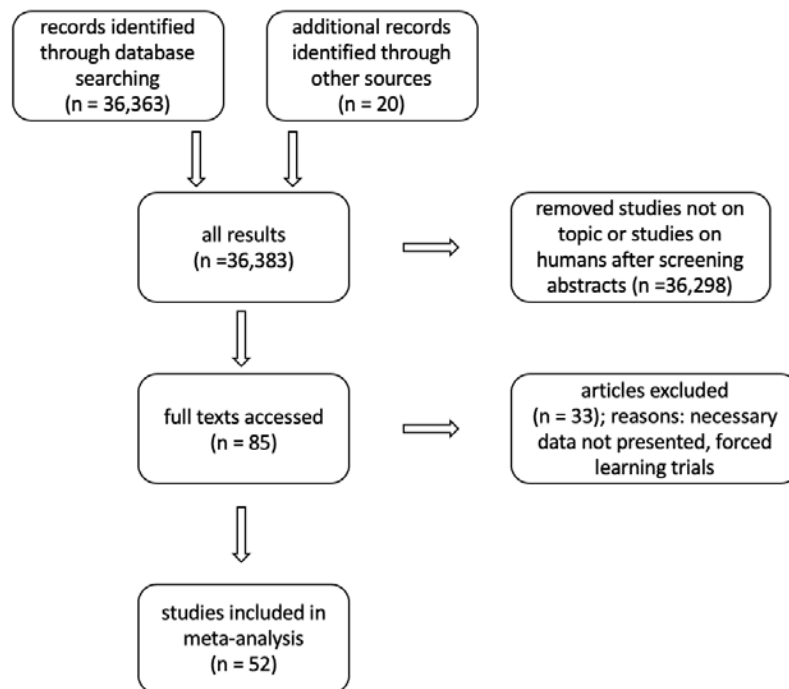

517

518 **Figure 1.** PRISMA diagram of the systematic literature and data search process.

519

520

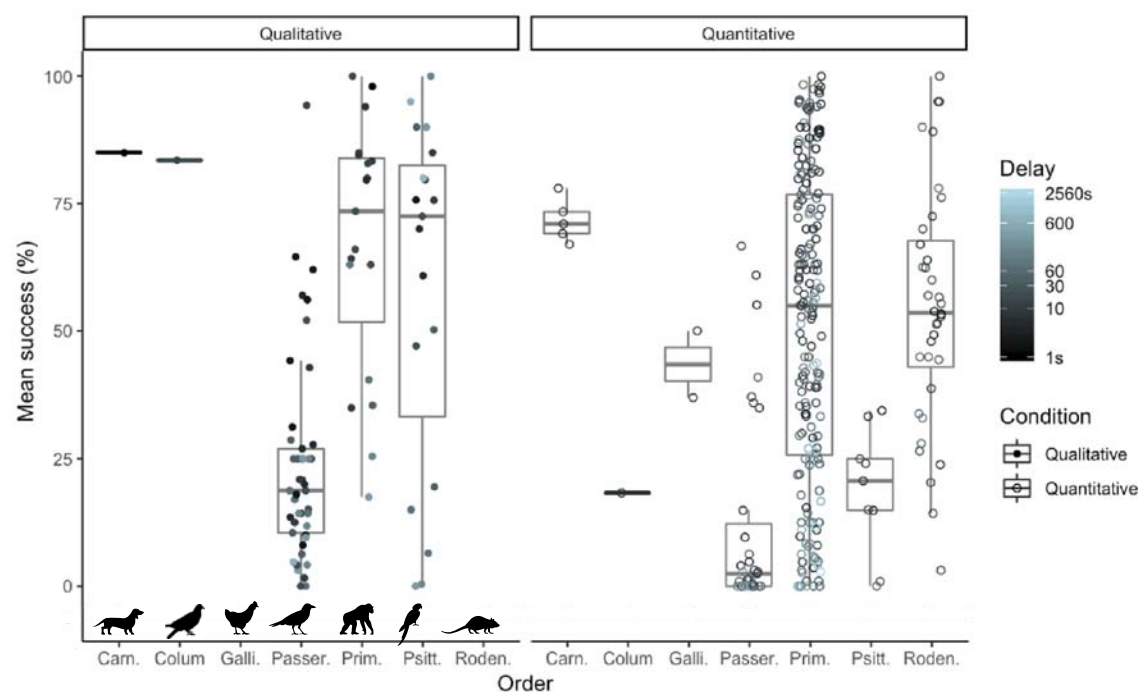

521

522 **Figure 2:** Mean percentage of trials successfully waited in different biological Orders. Box plots

523 show the median and the interquartile range from the 25th to the 75th percentiles, each data point

524 is an individual's waiting performance across all delay conditions in which it was tested.

525

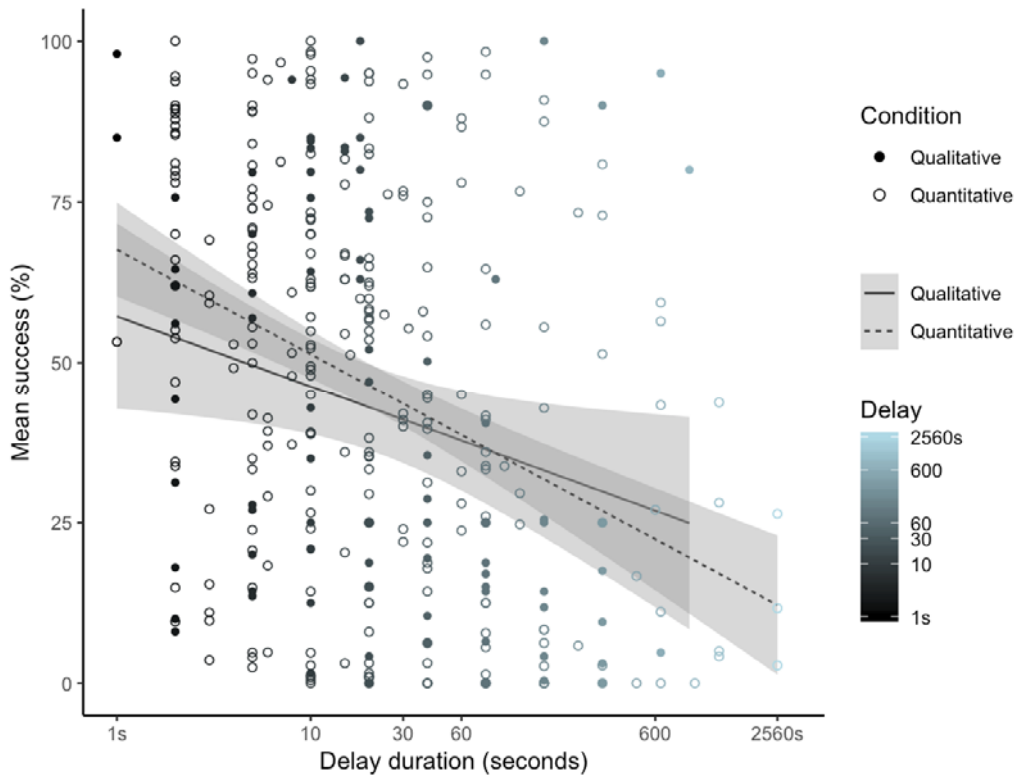

**Figure 3:** Mean percentage of trials successfully waited depending on delay duration. The predicted values are shown as solid line and 95% CI as shaded area. Black dots present mean values per species per study.

531

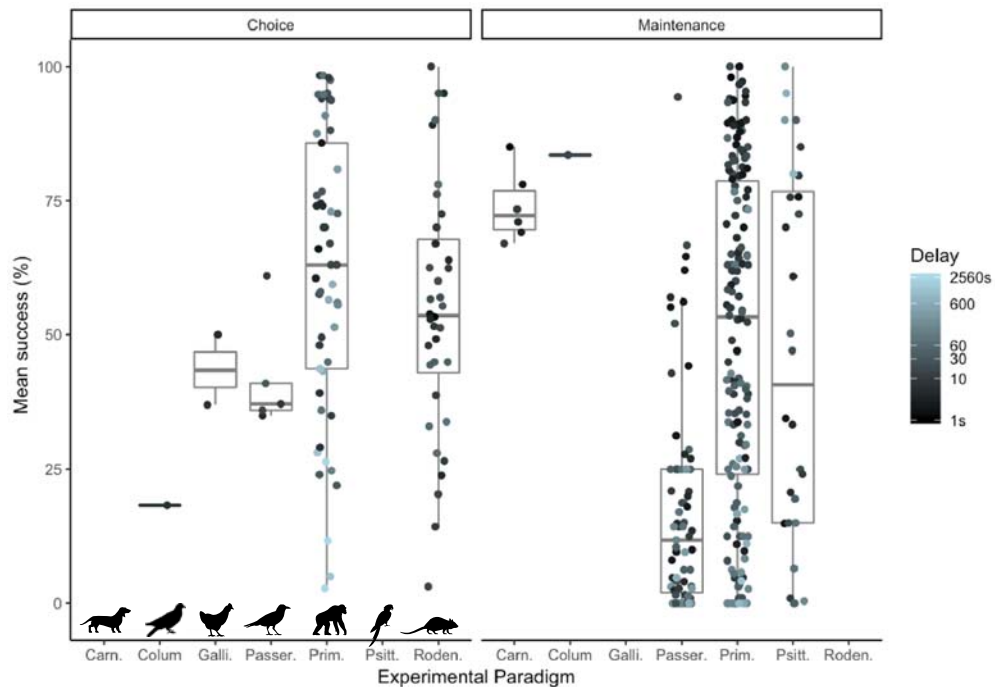

532

533 **Figure 4:** Mean percentage of trials successfully waited in different experimental paradigms. Box  
534 plots show the median and the interquartile range from the 25th to the 75th percentiles for each  
535 order (Carnivora, Columbiformes, Galliformes, Passeriformes, Primates, Psittaciformes, and  
536 Rodentia).

537
